# Supplementary material for: A retrospective study to evaluate the effect of preoperative hormonal therapy on continence recovery
Source: Frontiers journal article supplement (doi:10.3389/fonc.2022.1059410), 2023-01-13

**Supplementary Figure 1.** The Kaplan-Meier failure graph of postoperative ADT on continence recovery.

The Kaplan-Meier failure graph demonstrates subgroup analysis of the effect of postoperative ADT on continence recovery. (A) In the ADT subgroup, postoperative ADT did not affect continence recovery (Log rank  $p=0.232$ ). (B) In the ADT +Docetaxel subgroup, postoperative ADT delayed continence recovery (Log rank  $p=0.005^{**}$ ). (C) In ADT+Abiraterone subgroup, postoperative ADT did not affect continence recovery (Log rank  $p=0.805$ ).

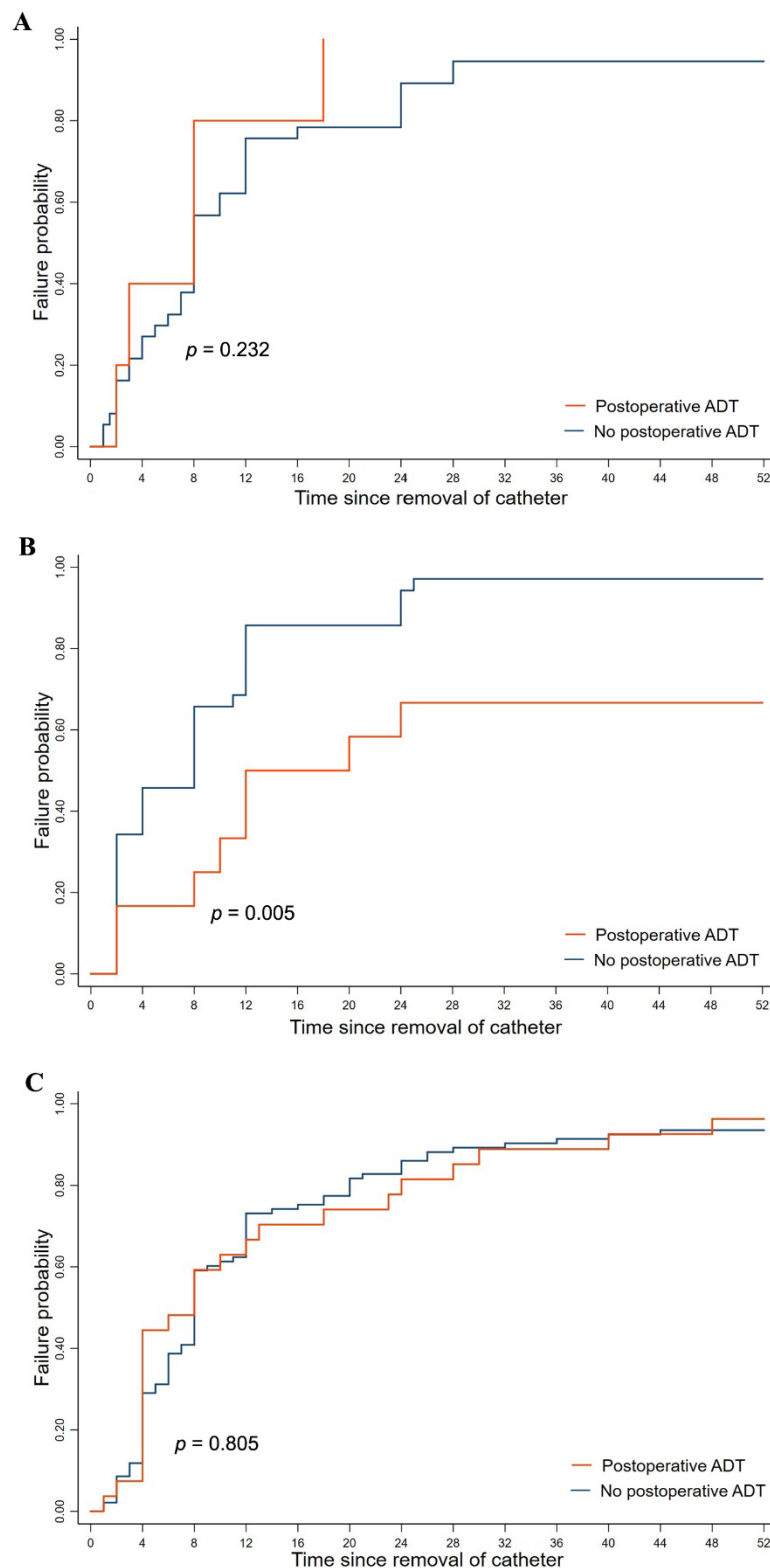

Supplement: Image_1.pdf [file Image_1.pdf]
